# Supplementary material
Source: PubMed Central journal article supplement (PMC3075283)

A

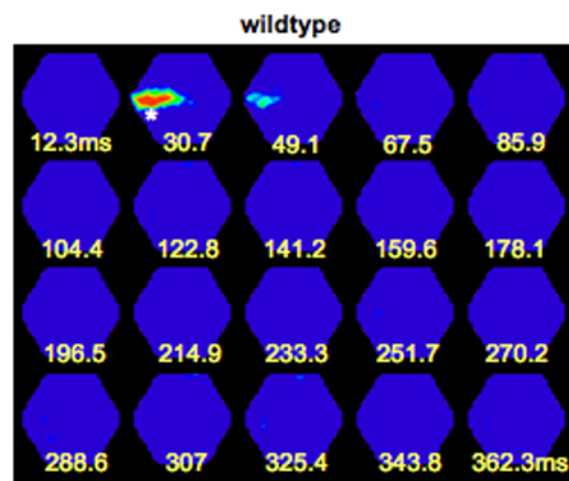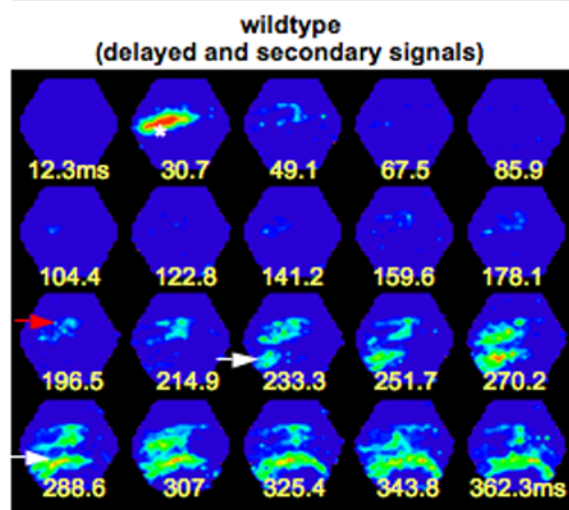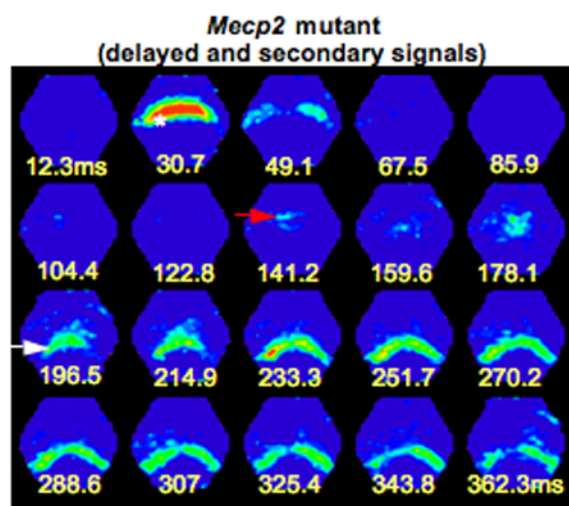

$0.2 \times 10^{-3} \Delta F/F$   $3.6 \times 10^{-3} \Delta F/F$

B

### Delayed SC-evoked VSD signals in CA1 in the presence of 4-AP

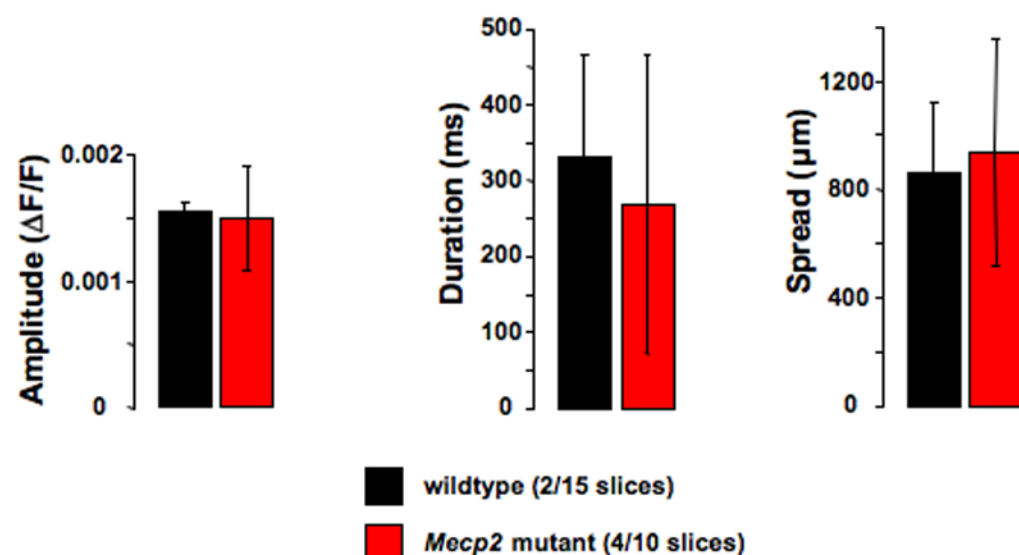

C

### Secondary SC-evoked VSD signals in dentate gyrus in the presence of 4-AP

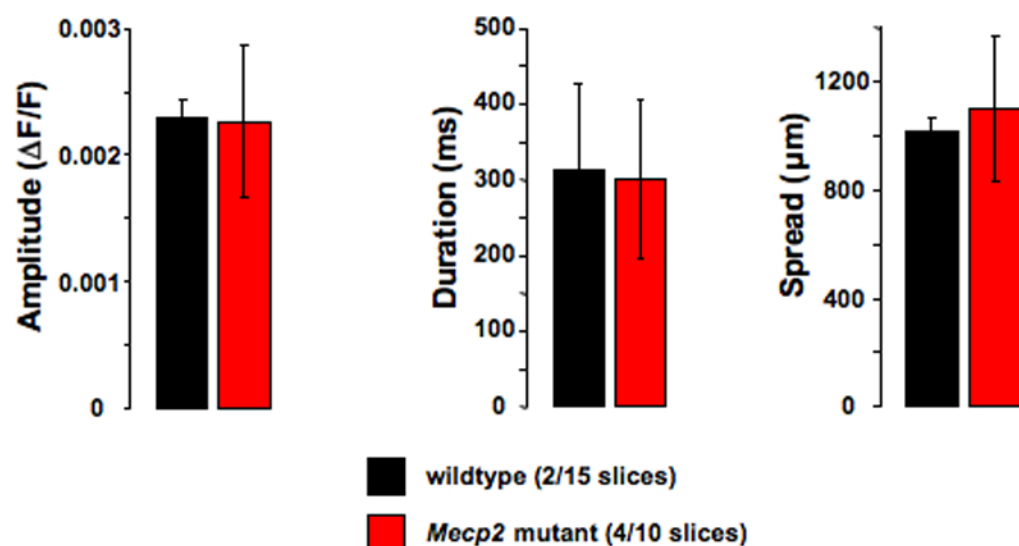

Supplement: supp_00800.2010_figS2.pdf [file supp_00800.2010_figS2.pdf]
