# Supplementary material
Source: PubMed Central journal article supplement (PMC3075283)

**A****Asymmetric spine synapses in CA1 *stratum radiatum***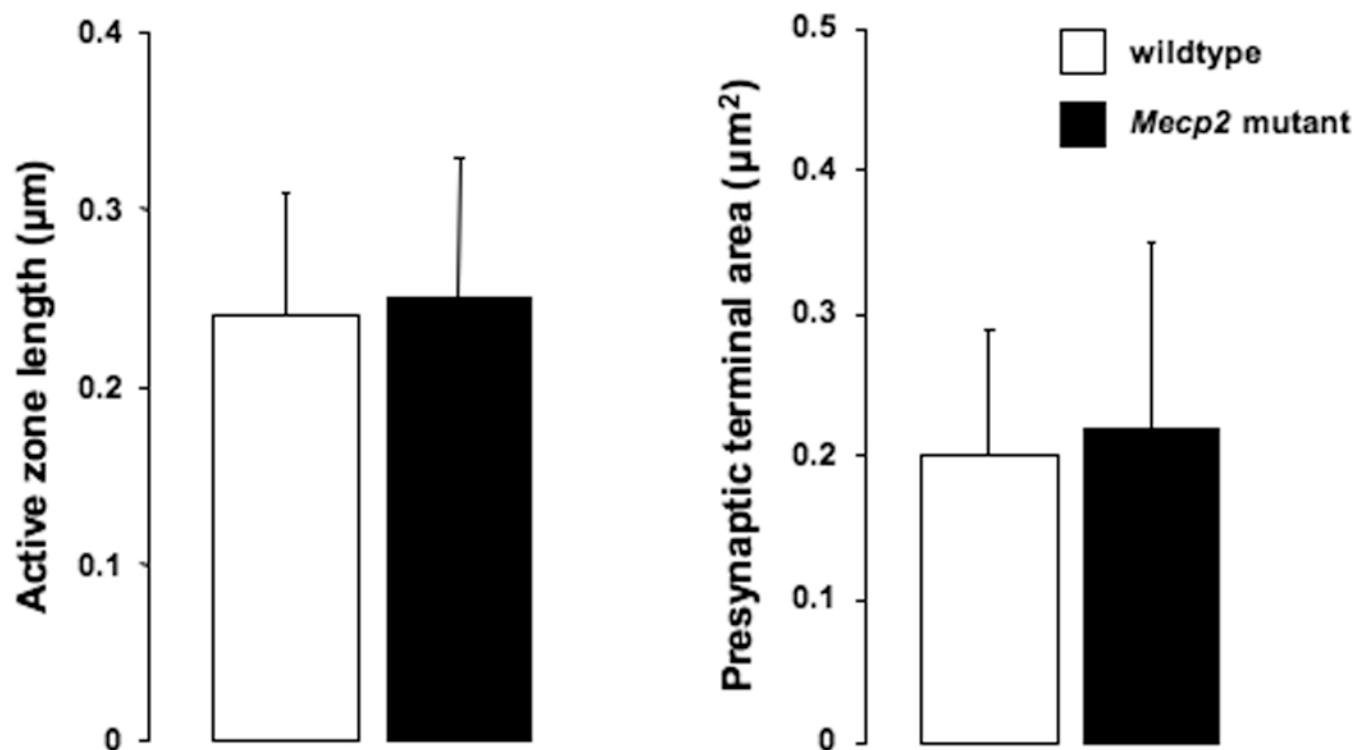**B****Symmetric shaft synapses in CA1 *stratum radiatum***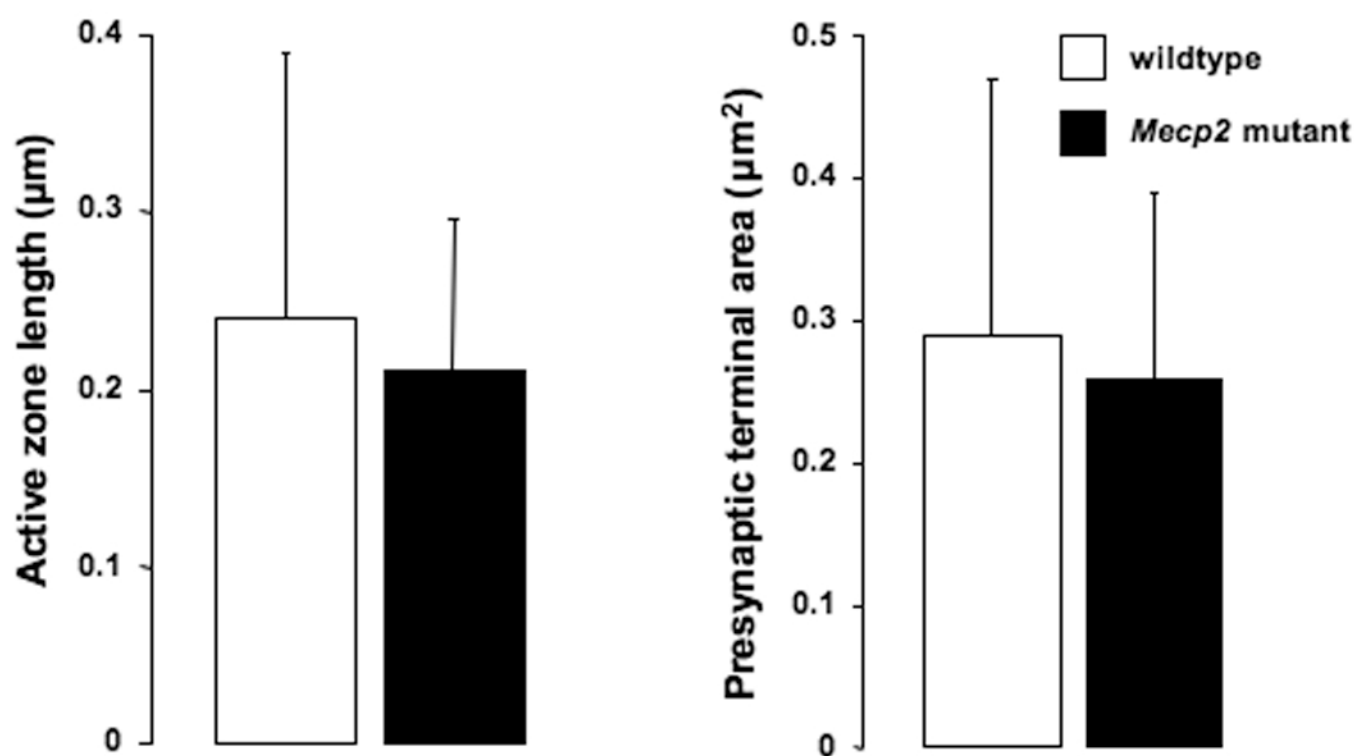

Supplement: supp_00800.2010_figS3.pdf [file supp_00800.2010_figS3.pdf]
