# Supplementary material
Source: PubMed Central journal article supplement (PMC3075283)
Supplement: supp_00800.2010_legends.pdf [file supp_00800.2010_legends.pdf]

1 **SUPPLEMENTAL FIGURE 1.** Area CA1 of hippocampal slices from symptomatic *Mecp2*  
2 mutant mice shows enhanced 4-AP-induced epileptiform activity.

3 **A.** Representative examples of the spatiotemporal pattern of VSD signals evoked in area  
4 CA1 by stimulation of afferent Schaffer collaterals in slices from a symptomatic *Mecp2*  
5 mutant mouse and a wildtype littermate before and after the application of 4-AP  
6 (125 $\mu$ M). The arrow points to the location of the stimulation electrode.

7 **B.** Amplitude and spatiotemporal pattern of VSD signals evoked in area CA1 by  
8 stimulation of afferent Schaffer collaterals in the presence of 4-AP in slices from  
9 symptomatic *Mecp2* mutant and wildtype littermate controls. Data expressed as  
10 mean $\pm$ SD. #  $p < 0.05$  aCSF vs. 4-AP; \*  $p < 0.05$  *Mecp2* mutant vs. wildtype in aCSF; \*\*  
11  $p < 0.05$  *Mecp2* mutant vs. wildtype in 4-AP.

12

13 **SUPPLEMENTAL FIGURE 2.** Schaffer stimulation in 4-AP causes delayed VSD signals in  
14 CA1 and secondary VSD signals in the dentate gyrus of either *Mecp2* mutant or wildtype  
15 slices.

16 **A.** Representative examples of the spatiotemporal pattern of VSD signals evoked by  
17 single pulse stimulation of Schaffer collaterals in slices from a wildtype showing brief and  
18 highly localized signals (top), a 4-AP-treated wildtype slice showing delayed CA1 signals  
19 and secondary dentate signals (middle), which were similar to those in a *Mecp2* mutant  
20 slice (bottom). The asterisk marks the location of the stimulating electrode, the red arrow  
21 points to CA1, and the white arrow to the dentate gyrus.

22 **B.** Amplitude and spatiotemporal pattern of delayed VSD signals evoked in area CA1 by  
23 stimulation of afferent Schaffer collaterals in the presence of 4-AP in slices from  
24 symptomatic *Mecp2* mutant and wildtype littermate controls.

25 **C.** Amplitude and spatiotemporal pattern of secondary VSD signals evoked in the  
26 dentate gyrus by stimulation of afferent Schaffer collaterals in the presence of 4-AP in  
27 slices from symptomatic *Mecp2* mutant and wildtype littermate controls.

28 Data expressed as mean $\pm$ SD.

29

30 **SUPPLEMENTAL FIGURE 3.** Quantitative analysis of synapse ultrastructure in hippocampal  
31 area CA1.

32 **A.** Lengths of active zones (defined as the length of the opposing PSDs), and areas of  
33 presynaptic terminals of asymmetric synapses on dendritic spines within CA1 *stratum*  
34 *radiatum*.

35 **B.** Lengths of active zones (defined as the length of the opposing PSDs), and areas of  
36 presynaptic terminals of symmetric synapses on dendritic shafts within CA1 *stratum*  
37 *radiatum*.

38 Data are expressed as mean $\pm$ SD.
