# Supplementary material
Source: PubMed Central journal article supplement (PMC3075283)

**A**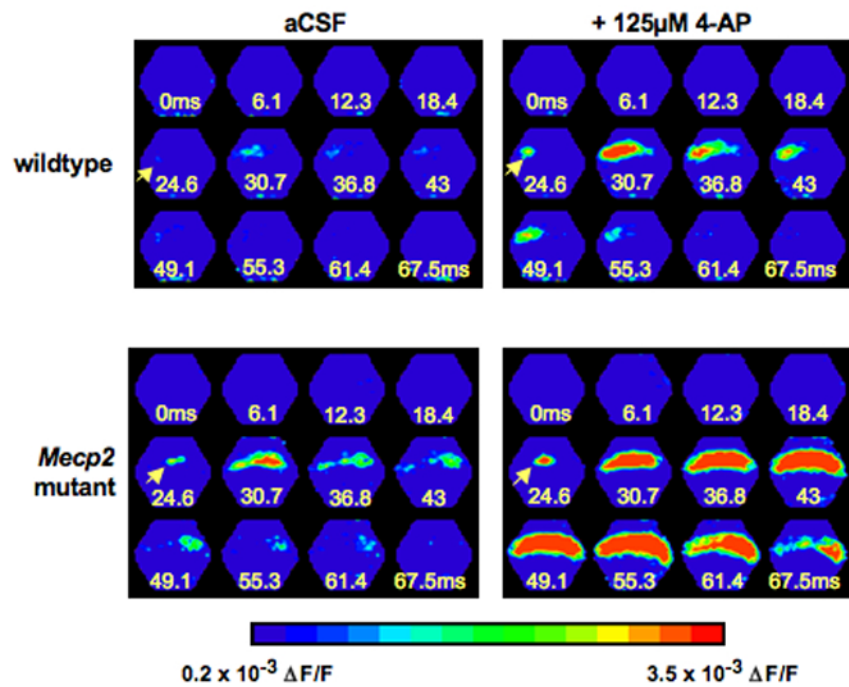**B**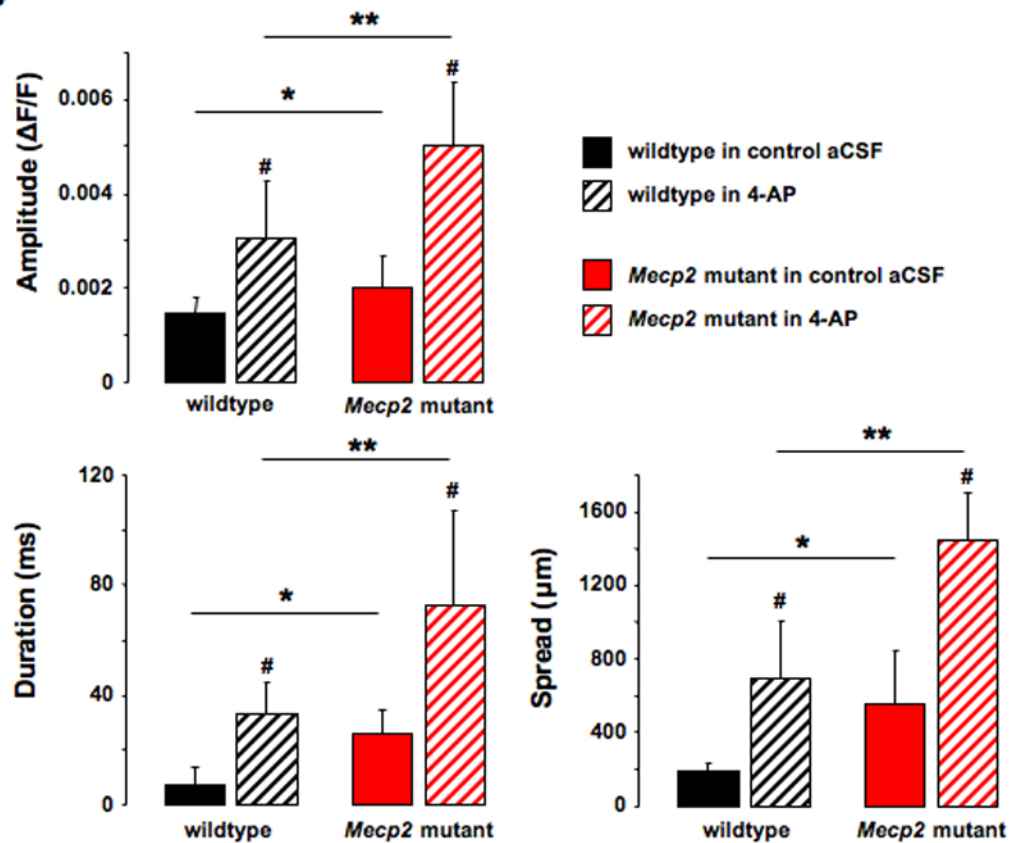

Supplement: supp_00800.2010_figS1.pdf [file supp_00800.2010_figS1.pdf]
